# Supplementary material for: Experimental lung injury induces cerebral cytokine mRNA production in pigs
Source: PeerJ journal article supplement (doi:10.7717/peerj.10471), 2020-12-09

A

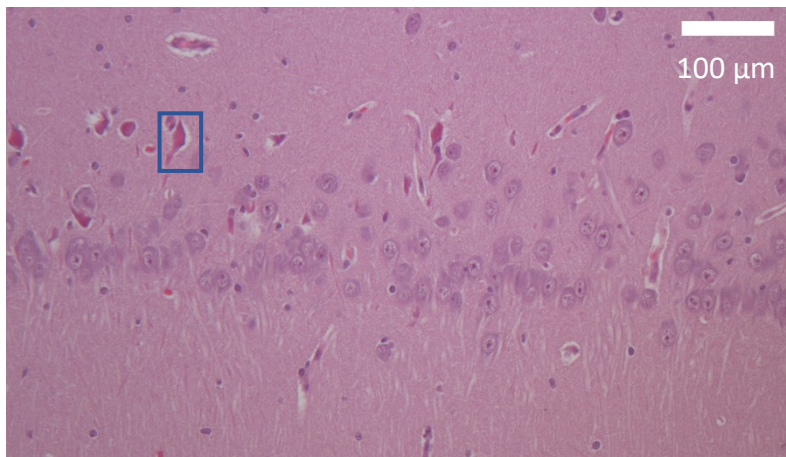

pyknosis and  
eosinophilic  
degeneration  
of a neuron

B

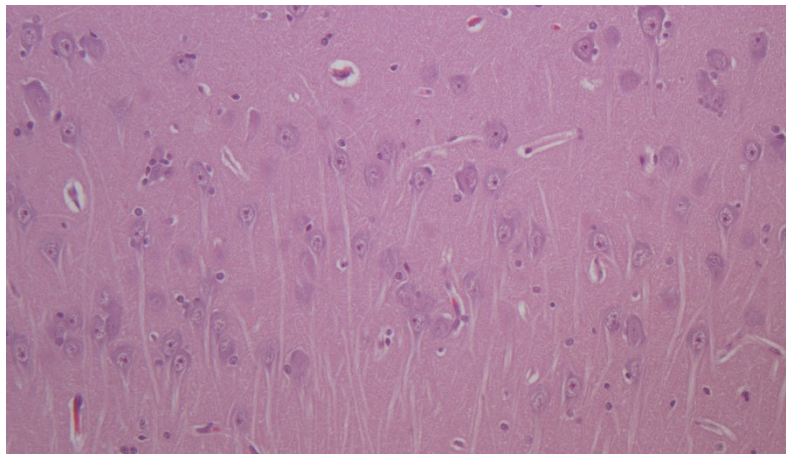

C

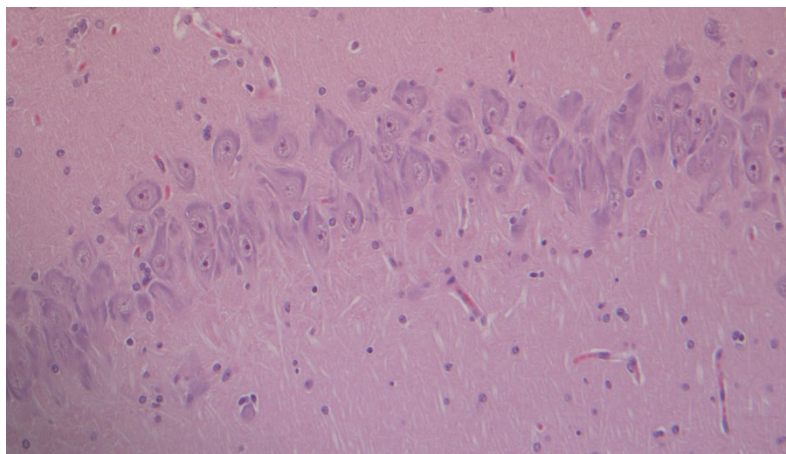

Supplement: Fig._Supp_1_CA1_neu.pdf [file Fig._Supp_1_CA1_neu.pdf]
